# Supplementary material for: Effects of UV-ozone irradiation on copper doped nickel acetate and its applicability to perovskite solar cells
Source: Royal Society of Chemistry journal article supplement (doi:10.1039/c6nr01308b), 2016-01-01
Supplement: c6nr01308b1.pdf [file c6nr01308b1.pdf]

# Supplement Information

## Effect of UV-Ozone Irradiation on Copper Doped Nickel acetate and Its Applicability to Perovskite Solar Cells

Jeongmo Kim , Hee Ryung Lee , Hyeong Pil Kim , Lin Tengda , Anil Kanwat , Abd. Rashid bin Mohd  
Yusoff and Jin Jang\*

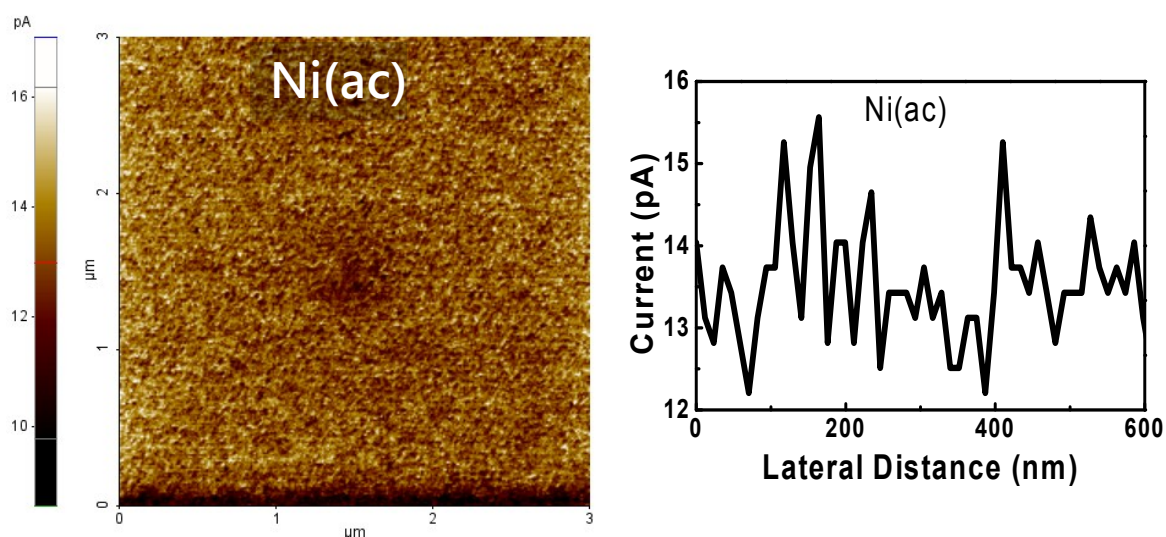

**Figure S1.** Conductive atomic force microscopy(C-AFM) images ( $3\mu\text{m} \times 3\mu\text{m}$ ) of Ni(ac) at  $V_{\text{bias}} = 0.1\text{ V}$ . [Current profiles are obtained from horizontal lines at y axis of  $1\mu\text{m}$ ]

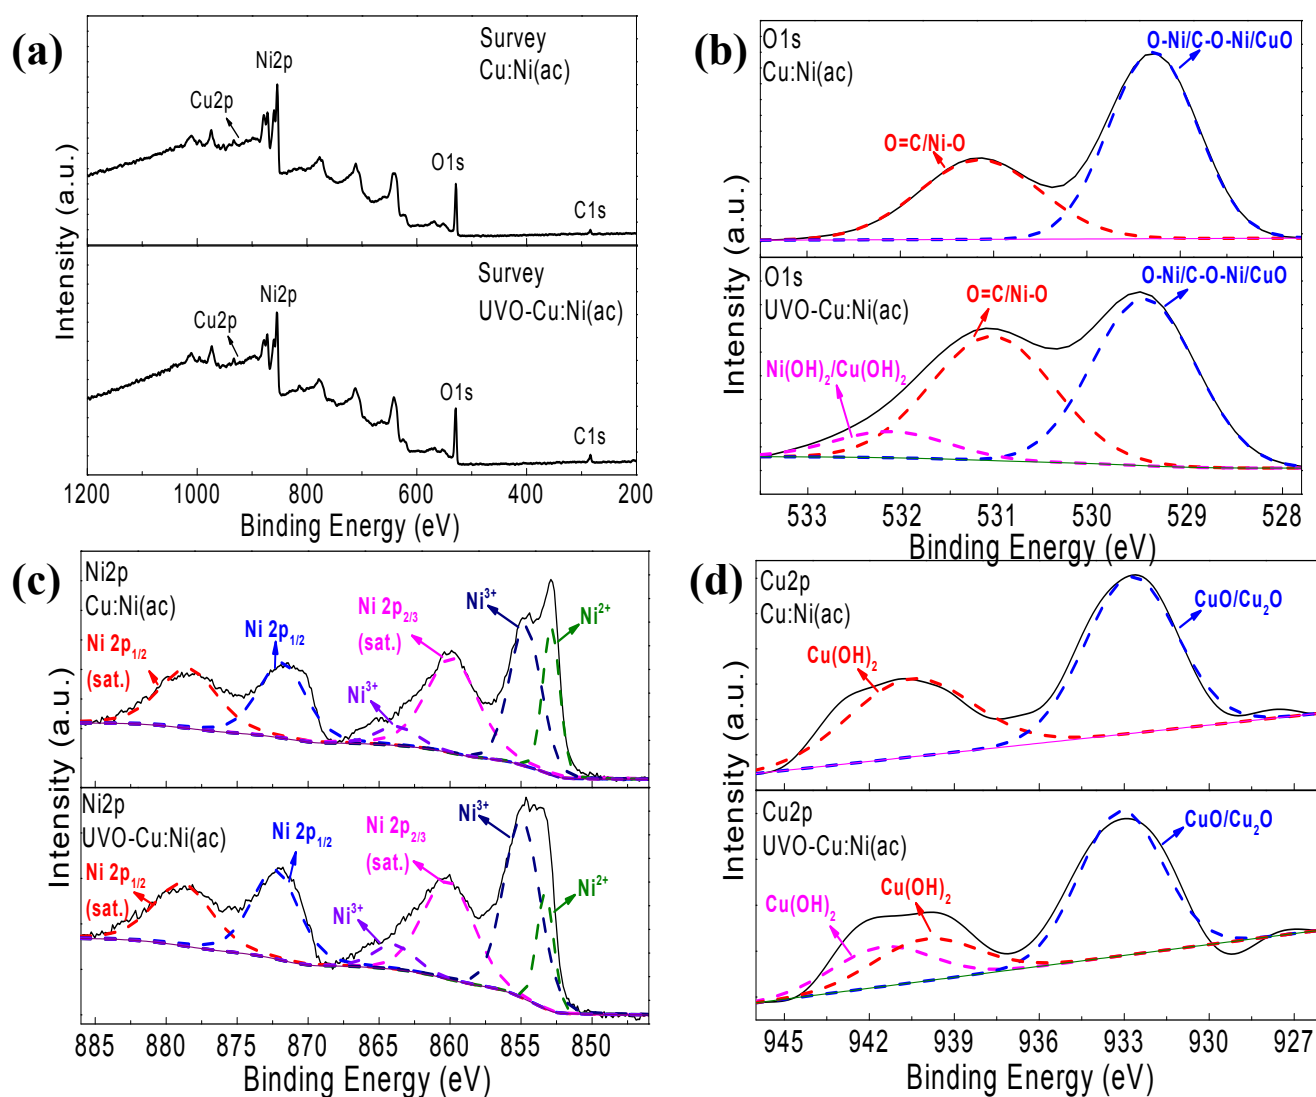

**Figure S2.** X-ray photoelectron spectroscopy (XPS) results of Cu:Ni(ac) and UVO-Cu:Ni(ac) thin films.; (a) survey scan. (b) O 1s narrow scan. (c) Ni 2p narrow scan. (d) Cu 2p narrow scan. [Reference peak is indicated inside.]

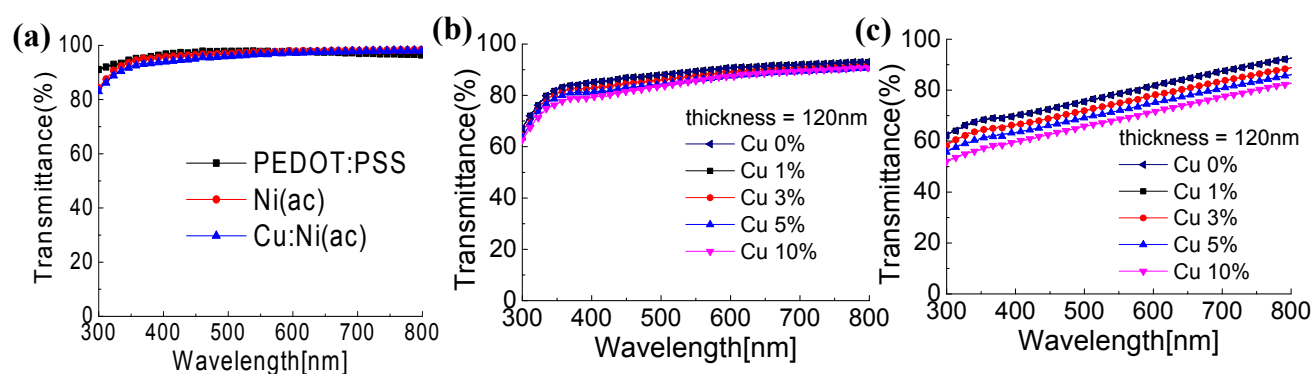

**Figure S3.** (a) Transmittances of thin films of PEDOT:PSS (31 nm), Ni(ac) (12 nm) and Cu:Ni(ac) (8 nm) respectively. (b) Optical transmittances of non-UVO irradiated 120 nm Cu:Ni(ac) films depending on copper doping ratio. (c) Optical transmittances of UVO-treated 120 nm Cu:Ni(ac) films.

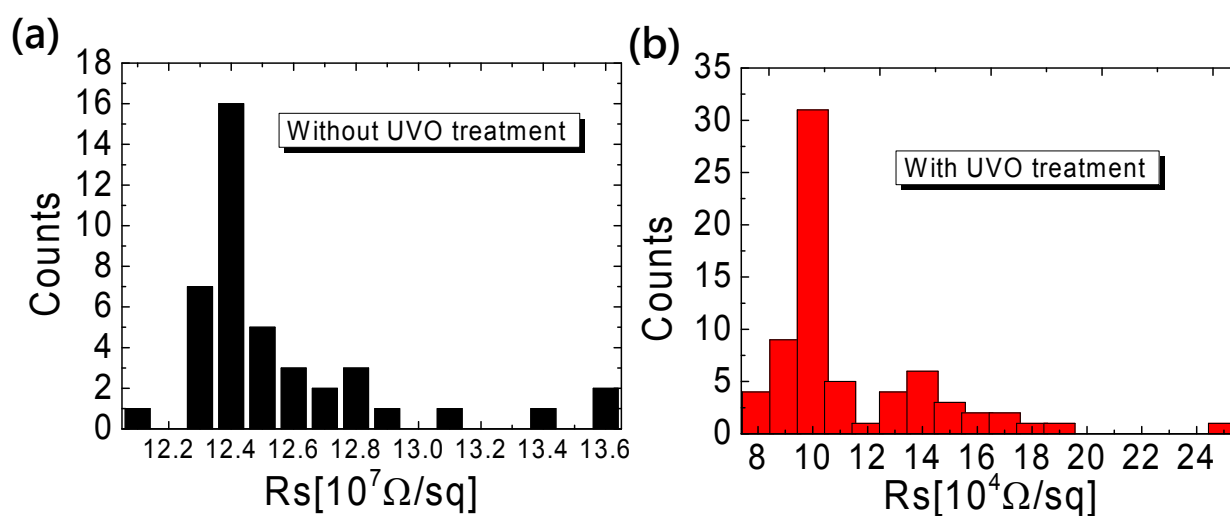

**Figure S4.** Repeatability of  $R_s$ (Sheet Resistance) values for Cu:Ni(ac) thin films.; (a) without UVO treatment. (b) With UVO treatment.

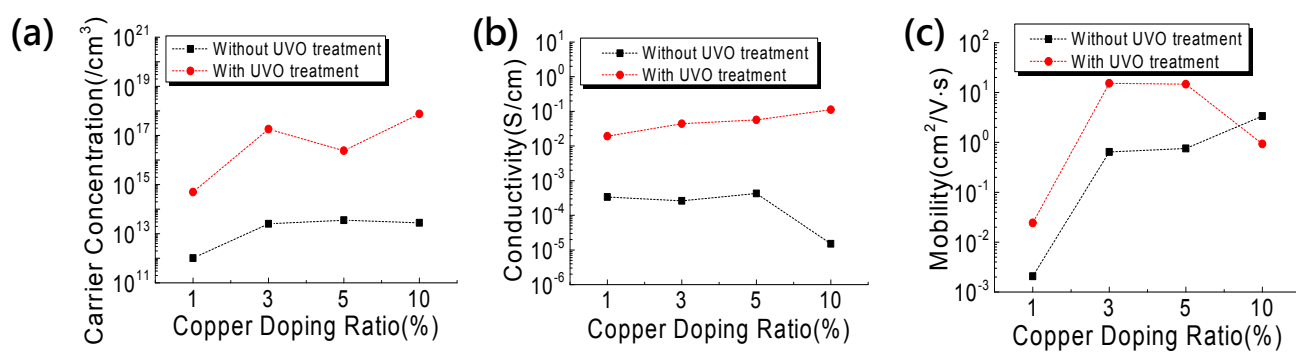

**Figure S5.** Copper doping ratio dependent hall effect results.; (a) carrier concentration [ $\text{cm}^{-3}$ ]. (b) conductivity [ $\text{S/cm}$ ]. (c) hall mobility [ $\text{cm}^2/\text{V}\cdot\text{s}$ ].

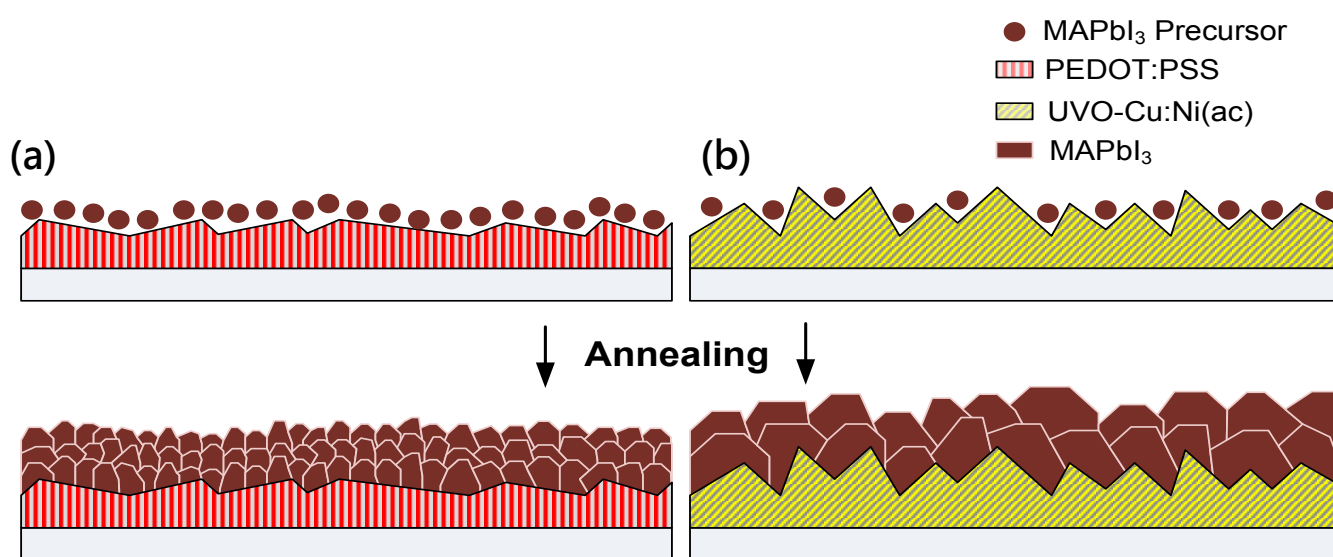

**Figure S6.** Schematic diagram of the  $\text{MAPbI}_3$  crystallization process on the surface of thin films.; (a) on the PEDOT:PSS film (rms value = 1.482 nm). (b) on the UVO-Cu:Ni(ac) (rms value = 2.029 nm).

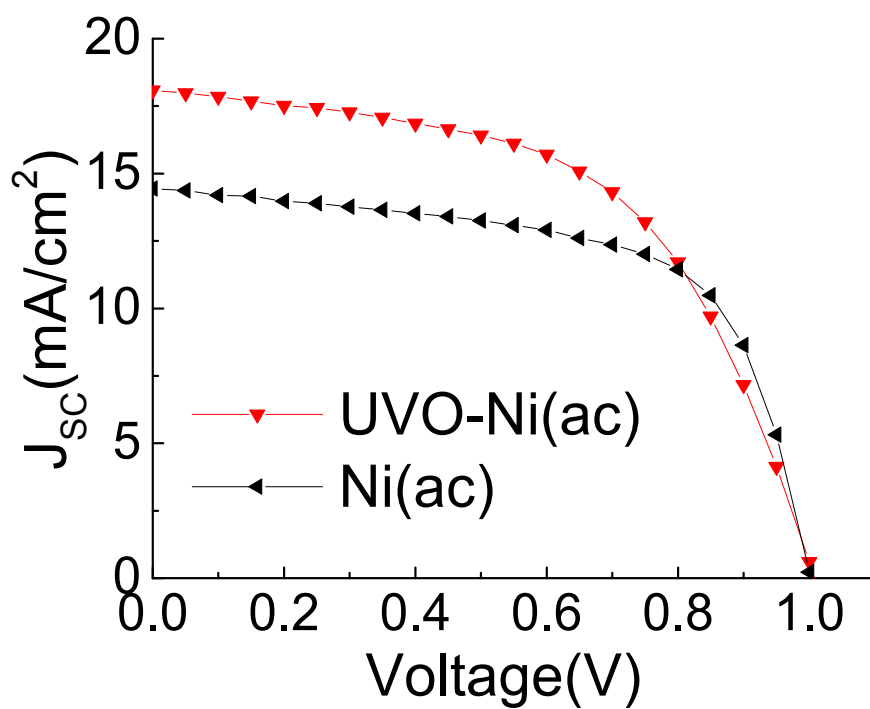

**Figure S7.** J-V characteristics of device performance measured at 100 mW/cm<sup>2</sup> based on Ni(ac) and UVO- Ni(ac) respectively.

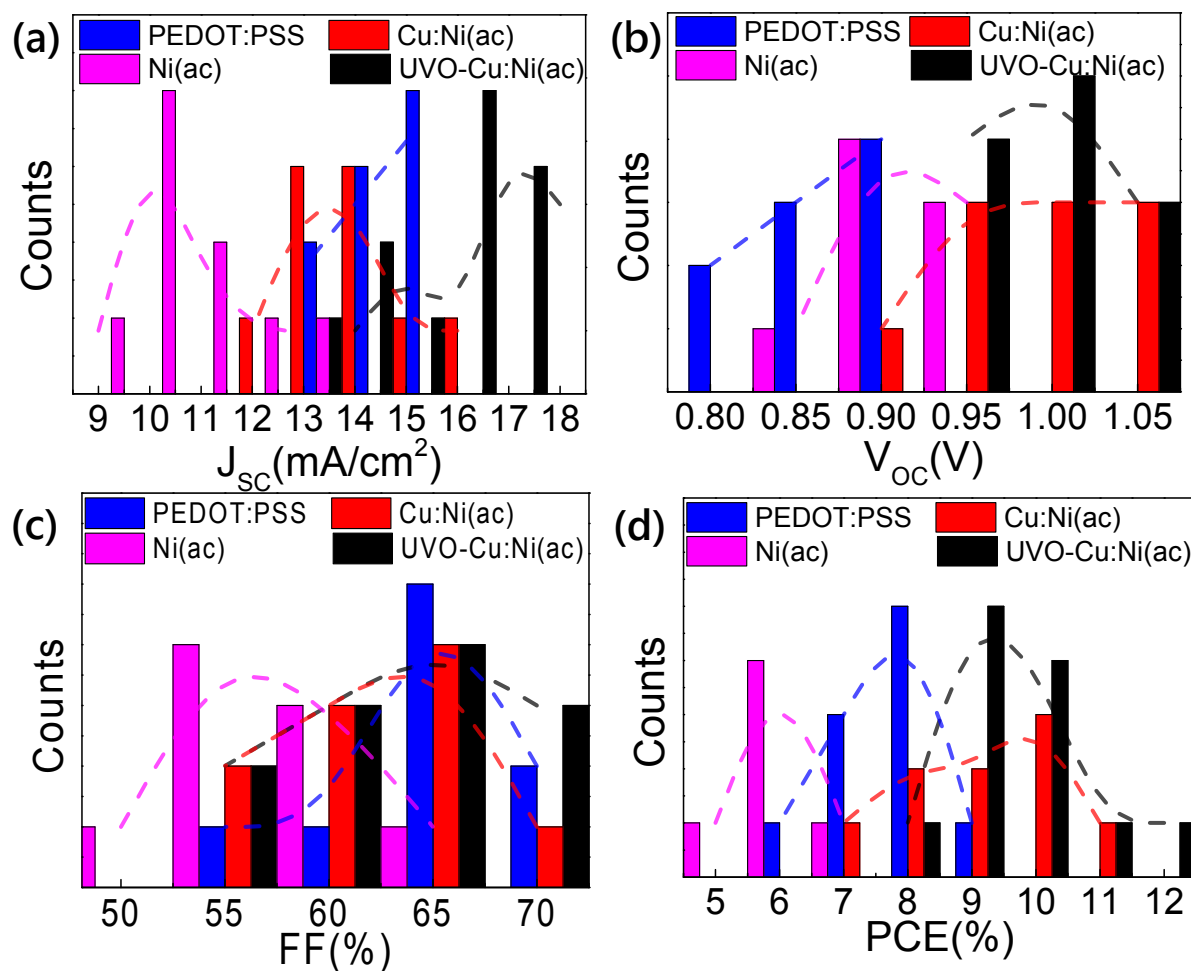

**Figure S8.** Repeatability of device performances based on different hole transport layers of PEDOT:PSS, Ni(ac) and Cu:Ni(ac).; (a)  $J_{sc}$  ( $\text{mA}/\text{cm}^2$ ). (b)  $V_{oc}$  (V). (c) FF (%) and (d) PCE (%).
